# Supplementary material
Source: PubMed Central journal article supplement (PMC3402159)
Supplement: NIHMS290260-supplement-01.pdf [file NIHMS290260-supplement-01.pdf]

**eTable: Association between patient and treatment characteristics and the likelihood of livebirth (Adjusted odds ratios \* (95% confidence intervals)) from four regression models (n = 2318 couples, 3913 IVF cycles), with additional adjustment for all covariates evaluated.**

| Covariate           | First cycle only <sup>†</sup> | Discrete survival <sup>‡</sup> | GEE <sup>#</sup>  | Mixed effects <sup>**</sup> |
|---------------------|-------------------------------|--------------------------------|-------------------|-----------------------------|
| Previous livebirth  |                               |                                |                   |                             |
| No                  | 1.00 ( referent )             | 1.00 ( referent )              | 1.00 ( referent ) | 1.00 ( referent )           |
| Yes                 | 1.45 (1.14,1.84)              | 1.31 (1.09,1.58)               | 1.34 (1.10,1.63)  | 1.40 (1.06,1.83)            |
| Female age          |                               |                                |                   |                             |
| <35 years           | 1.00 ( referent )             | 1.00 ( referent )              | 1.00 ( referent ) | 1.00 ( referent )           |
| 35-37 years         | 0.92 (0.70,1.22)              | 0.96 (0.78,1.18)               | 0.97 (0.78,1.21)  | 0.98 (0.77,1.24)            |
| 38-40 years         | 0.57 (0.41,0.80)              | 0.63 (0.49,0.80)               | 0.63 (0.48,0.81)  | 0.61 (0.42,0.88)            |
| >40 years           | 0.24 (0.15,0.39)              | 0.23 (0.16,0.33)               | 0.24 (0.16,0.34)  | 0.21 (0.09,0.48)            |
| Primary Diagnosis   |                               |                                |                   |                             |
| Idiopathic          | 1.00 ( referent )             | 1.00 ( referent )              | 1.00 ( referent ) | 1.00 ( referent )           |
| Male                | 1.23 (0.92,1.65)              | 1.09 (0.88,1.35)               | 1.08 (0.87,1.35)  | 1.14 (0.88,1.46)            |
| Female              | 0.91 (0.70,1.17)              | 0.93 (0.77,1.13)               | 0.92 (0.76,1.13)  | 0.92 (0.74,1.15)            |
| Gonadotrop. dose/10 | 0.84 (0.77,0.91)              | 0.90 (0.85,0.94)               | 0.89 (0.85,0.94)  | 0.86 (0.79,0.94)            |
| Down regulation     |                               |                                |                   |                             |
| No                  | 1.00 ( referent )             | 1.00 ( referent )              | 1.00 ( referent ) | 1.00 (referent)             |
| Yes                 | 1.34 (1.00,1.80)              | 1.25 (1.02,1.52)               | 1.30 (1.06,1.58)  | 1.36 (1.04,1.78)            |
| ICSI                | 0.79 (0.60,1.04)              | 0.93 (0.77,1.14)               | 0.93 (0.77,1.13)  | 0.85 (0.68,1.08)            |
| Embryos transferred | 1.29 (1.16,1.43)              | 1.23 (1.15,1.32)               | 1.22 (1.15,1.30)  | 1.21 (1.07,1.37)            |
| Cycle # (Cox only)  |                               |                                |                   |                             |
| Cycle 1             |                               | 1.00 ( referent )              |                   |                             |
| Cycle 2             |                               | 0.86 (0.72,1.03)               |                   |                             |
| Cycle 3             |                               | 0.68 (0.52,0.89)               |                   |                             |
| Cycle 4             |                               | 0.69 (0.47,1.02)               |                   |                             |
| Cycle 5             |                               | 0.59 (0.31,1.10)               |                   |                             |
| Cycle 6             |                               | ---                            |                   |                             |
| Male age            |                               |                                |                   |                             |
| <35 years           | 1.00 ( referent )             | 1.00 ( referent )              | 1.00 ( referent ) | 1.00 ( referent )           |
| 35-37 years         | 0.92 (0.70,1.21)              | 1.04 (0.85,1.28)               | 1.03 (0.83,1.28)  | 1.05 (0.83,1.33)            |
| 38-40 years         | 0.86 (0.63,1.18)              | 0.80 (0.63,1.02)               | 0.80 (0.62,1.03)  | 0.78 (0.58,1.04)            |
| >40 years           | 0.85 (0.61,1.17)              | 0.86 (0.67,1.10)               | 0.85 (0.66,1.10)  | 0.84 (0.63,1.13)            |
| BMI                 |                               |                                |                   |                             |
| <20                 | 1.00 ( referent )             | 1.00 ( referent )              | 1.00 ( referent ) | 1.00 ( referent )           |
| 20-24.9             | 1.08 (0.81,1.45)              | 1.11 (0.89,1.38)               | 1.11 (0.89,1.39)  | 1.14 (0.88,1.47)            |
| 25-29.9             | 1.02 (0.72,1.45)              | 1.13 (0.87,1.46)               | 1.11 (0.85,1.46)  | 1.16 (0.85,1.57)            |
| ≥30                 | 1.06 (0.70,1.60)              | 1.05 (0.76,1.43)               | 1.05 (0.76,1.45)  | 1.09 (0.76,1.56)            |
| Cycle E2/1000       | 1.03 (0.89,1.19)              | 1.00 (0.90, 1.12)              | 1.01 (0.91,1.13)  | 1.01 (0.90,1.15)            |

|                   |                   |                   |                  |                  |
|-------------------|-------------------|-------------------|------------------|------------------|
| Oocytes retrieved | 1.00 (0.98, 1.02) | 1.00 (0.99, 1.02) | 1.00 (0.99,1.02) | 1.00 (0.99,1.02) |
|-------------------|-------------------|-------------------|------------------|------------------|

\* All models were also adjusted for clinic site and study enrollment period.

† Multivariate logistic regression using first-cycle data only, n = 2092 couples, 2092 cycles.

‡ Discrete survival, a.k.a. Cox proportional odds model, fit using Proc Logistic including cycle number as a class variable.

# Generalized estimating equations, using empirical estimates for standard errors and exchangeable working correlation, fit using Proc Genmod.

\*\* Mixed effects model, using the logit link and Gaussian random intercept, fit using Proc NL Mixed.
